# Supplementary material for: Achievement of High-Response Organic Field-Effect Transistor NO2 Sensor by Using the Synergistic Effect of ZnO/PMMA Hybrid Dielectric and CuPc/Pentacene Heterojunction
Source: MDPI journal article supplement (doi:10.3390/s16101763), 2016-10-21
Supplement: s1 [file s1]

# Supplementary Materials: Achievement of High Response Organic Field-Effect Transistor NO<sub>2</sub> Sensor by Using the Synergistic Effect of ZnO/PMMA Hybrid Dielectric and CuPc/Pentacene Heterojunction

Shijiao Han, Jiang Cheng, Huidong Fan, Junsheng Yu and Lu Li

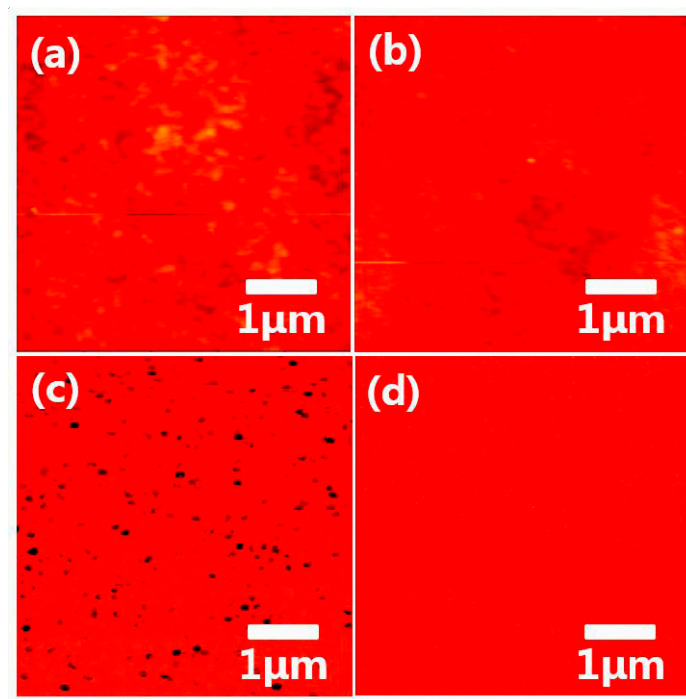

**Figure S1.** AFM images of ZnO/PMMA hybrid and PMMA dielectrics spin-coated on ITO glass substrate, (a,b) height images and (c,d) phase images.
